# Supplementary material for: Lake O'Hara alpine hydrological observatory: Hydrological and meteorological dataset, 2004–2017
Source: Copernicus journal article supplement (doi:10.5194/essd-2018-83), 2018-08-02
Supplement: Supplementary file [file essd-2018-83-AC1-supplement.zip]

Table S1. Ranges of dates where OHAWS was affected by snow capping (i.e. periods over which precipitation data at OHAWS were approximated from their relationship to precipitation recorded at OPAWS). Total precipitation approximated over snow capping periods is also shown.

| Start      | End        | Total precipitation (mm) |
|------------|------------|--------------------------|
| 2011-02-14 | 2011-03-09 | 37.8                     |
| 2012-03-04 | 2012-04-10 | 170.0                    |
| 2012-12-11 | 2013-01-15 | 47.8                     |
| 2014-01-09 | 2014-01-26 | 41.1                     |
| 2014-11-21 | 2015-01-21 | 137.6                    |
| 2016-11-27 | 2017-01-11 | 52.7                     |

Table S2. Summary table listing time series, measurement interval and years of availability. For years highlighted in green, timeseries data are available with no large data gaps (>1 month). For years highlighted in orange, timeseries data are available with one or more large gaps. For years highlighted in white, no timeseries data are available.

[illegible]

Table S3. Universal Transverse Mercator coordinates of weather (OHAWS and OPAWS) and stream gauging stations (Zone 11, North American Datum 1983).

| Station            | Easting | Northing |
|--------------------|---------|----------|
| OHAWS              | 545820  | 5689974  |
| OPAWS              | 547234  | 5688222  |
| Gorge              | 546951  | 5688770  |
| Mary               | 546407  | 5689381  |
| Oesa Falls         | 546986  | 5689650  |
| Outlet             | 546024  | 5689869  |
| Upper Opabin Creek | 547193  | 5688116  |
| Hungabee           | 547340  | 5688082  |
| Opabin West        | 546750  | 5689402  |
| Opabin East        | 546900  | 5689437  |
| Lefroy Oesa        | 547951  | 5689574  |

Table S4. Measured sensor heights at OPAWS and OHAWS over the monitoring period of 2004 – 2017.

| Station | Date      | Sensor         | Height (m) |
|---------|-----------|----------------|------------|
| OPAWS   | 11-Jun-15 | SR-50          | 2.42       |
|         |           | HMP45          | 2.53       |
|         |           | Geonor T200B   | 2.37       |
|         |           | CNR1           | 2.69       |
|         | 28-Aug-12 | SR-50          | 2.49       |
|         |           | CNR1           | 2.74       |
|         |           | HMP45          | 2.60       |
|         |           | RM Young 05103 | 4.05       |
|         | 24-Sep-12 | SR-50          | 2.87       |
|         |           | CNR1           | 2.71       |
|         |           | HMP45          | 3.40       |
|         |           | RM Young 05103 | 4.67       |
|         | 23-Jan-07 | SR-50          | 2.99       |
|         | 5-Dec-06  | SR-50          | 1.91       |
|         |           | CNR1           | 2.50       |
|         |           | HMP45          | 3.33       |
|         | 20-Jun-06 | SR-50          | 1.56       |
| OHAWS   | 11-Jun-15 | SR-50          | 2.15       |
|         |           | HMP45          | 2.19       |
|         |           | NR-Lite        | 2.00       |
|         |           | RM Young 05103 | 3.10       |
|         |           | Geonor T200B   | 2.22       |
|         |           |                |            |
|         | 28-Sep-11 | SR-50          | 2.10       |
|         | 06-Dec-06 | SR-50          | 1.79       |
|         | 21-Jun-06 | SR-50          | 1.56       |
|         | 21-Apr-06 | SR-50          | 1.87       |
